# Supplementary material for: Basement membrane remodelling regulates mouse embryogenesis
Source: Springer Nature journal article supplement (doi:10.1038/s41586-020-2264-2), 2020-05-06
Supplement: MOESM16 [file 41586_2020_2264_MOESM16_ESM.xlsx]

## Sheet: Figure 4
Figure 4B							Figure 4C																							Figure 4D/ Extended Data Figure 8C			Figure 4H
Control		NSC+PRINO					Normalized embryo length																							E5.0 - 5.25	E5.5 - E5.75		Control	NSC+. PRINO
Normal Perforations	No perforations	Normal Perforations	No perforations			Hours	Control embryos 1-7								NSC+Prino embryos 1-7															11.134	73.275		257	36
9 mbryos	4 embryos	0 embryos	16 embryos			0	1	1	1	1	1	1	1		1	1	1	1	1	1	1									16.108	70.459		279	11
						1	0.980101	1.07571	1.03419	1.04059	0.993839	1.04028	1.1638		1.00091	1.01337	1.01559	0.904209	0.984703	1.00878	1.02409									33.218	52.537		210	21
						2	1.02819	1.06579	1.1172	1.14254	1.02218	1.03084	1.24201		1.01421	1.04096	1.03973	0.940758	0.991166	1.04316	1.02924									47.137	30.932		177	16
						3	1.03647	1.11246	1.10657	1.18461	1.05957	1.05727	1.28119		1.06453	1.05427	1.09202	0.918244	1.04235	1.03246	1.08257									42.465	65.188		58	37
						4	1.05215	1.14389	1.17176	1.26588	1.10617	1.1196	1.36076		1.06721	1.1191	1.13385	0.918761	1.10353	1.0871	1.14496									37.713	78.61		141	28
						5	1.03668	1.17683	1.24594	1.31247	1.16751	1.1761	1.40922		1.06713	1.18817	1.18176	0.932422	1.10845	1.07927	1.15208									53.076	86.645		191	96
						6	1.06709	1.16338	1.28244	1.31172	1.16646	1.16963	1.47932		1.0578	1.1109	1.19635	0.990202	1.14118	1.14356	1.16997									18.221	69.393		130	25
						7	1.16349	1.22162	1.32102	1.36534	1.16935	1.2313	1.41131		1.05374	1.15221	1.243	1.02856	1.13906	1.12328	1.1916									86.806	77.597		257	7
						8	1.25719	1.24068	1.35964	1.38998	1.21167	1.26814	1.51677		1.06585	1.10316	1.24123	1.07666	1.13435	1.15	1.25723									80.034	89.35		320	57
						9	1.32835	1.27739	1.43597	1.45686	1.26538	1.33961	1.55766		1.09808	1.20199	1.24935	1.12615	1.14735	1.19339	1.29544									56.559	79.112		250	63
						10	1.49006	1.32858	1.49895	1.53452	1.30943	1.39932	1.62531		1.08581	1.21046	1.24887	1.1444	1.18443	1.23589	1.30562									54.096	67.129			31
						11	1.51494	1.30423	1.54964	1.64403	1.35383	1.47079	1.62601		1.08313	1.11351	1.23037	1.14971	1.20598	1.27998	1.3479									76.823	84.789			42
						12	1.54417	1.41811	1.63197	1.67915	1.38399	1.56656	1.69239		1.08229	1.14539	1.24565	1.17512	1.23492	1.27875	1.34343									27.553	67.555			135
						13	1.55464	1.48938	1.66765	1.78604	1.44558	1.64872	1.71957		1.07411	1.14629	1.22425	1.21189	1.19886	1.28394	1.36229									75.351	75.277			44
						14	1.58509	1.43728	1.70193	1.82186	1.49775	1.6751	1.78087		1.09457	1.12109	1.19166	1.23582	1.20931	1.31411	1.4003									73.615	38.597			35
						15	1.64811	1.65716	1.74554	1.82698	1.59091	1.79419	1.8649		1.11458	1.08469	1.16226	1.24576	1.19705	1.33731	1.37951									37.948	38.893			62
																														71.528	56.723
																														76.704	86.96
																														58.589	88.585
																														33.043	81.367
																														15.087	86.293
																														5.986	82.951
																														3.365	69.368
																														83.627	50.892
																														15.521	36.851
																														9.39	89.51
																														31.799	8.706
																														15.847	16.072
																														72.948	57.611
																														32.442	54.634
																														26.594	86.019
																														16.625	89.144
																														13.912	8.784
																														24.707	4.84
																														72.827	37.008
																														17.566	80.342
																														0.702	79.368
																														61.947	54.577
																														11.433	61.237
																														26.854	49.221
																														24.126	4.712
																														85.958	75.957
																														52.069	20.536
																														86.607	16.126
																														62.793	36.893
																														85.853	44.687
																														10.91	44.15
																														0.256	55.346
																														18.547	60.219
																														6.435	77.604
																														5.249	57.329
																														18.807	85.53
																														18.063	69.346
																														25.822	37.795
																														17.085	84.119
																														80.229	71.784
																														68.092	50.043
																														69.291	57.328
																														26.757	39.66
																														4.45	87.133
																														3.669	56.264
																														1.986	27.784
																														21.087	66.108
																														7.524	88.32
																														0.518	64.993
																														40.15	70.323
																														45.073	19.113
																														54.312	59.322
																														45.443	58.247
																														55.903	50.387
																														10.075	44.058
																														44.767	7.475
																														44.145	54.233
																														0.181	65.948
																														23.703	67.042
																														4.688	48.51
																														30.023	89.735
																														15.918	69.537
																														41.14	88.792
																														1.509	58.072
																														32.239	34.022
																														14.331	25.274
																														1.363	34.12
																														62.91	47.582
																														48.847	61.032
																														25.348	35.051
																														60.394	40.985
																														48.213	77.203
																														28.894	74.848
																														2.441	88.33
																														41.572	78.015
																														30.831	67.073
																														22.555	34.536
																														42.382	42.847
																														27.519	5.57
																														0.757	42.411
																														30.464	9.542
																														41.151	11.226
																														32.496	69.859
																														25.526	72.107
																														65.34	58.574
																														56.595	87.696
																														31.558	85.454
																														60.357	61.197
																														70.872	43.98
																														68.014	32.443
																														47.873	49.324
																														47.395	14.134
																														22.634	48.157
																														56.105	58.064
																														58.712	31.664
																														53.72	21.298
																														62.657	78.85
																														50.451	87.09
																														50.975	86.385
																														30.444	87.655
																														39.746	65.107
																														62.302	55.933
																														84.013	29.785
																														37.7	20.335
																														64.149	1.749
																														37.447	85.698
																														54.469	78.686
																														4.269	55.202
																														19.32	33.547
																														47.159	37.873
																														52.573	75.266
																														4.751	59.441
																														46.398	79.562
																														45.297	72.213
																														47.562	68.256
																														28.557	66.525
																														8.378	58.692
																														27.212	42.598
																														2.219	88.39
																														5.871	66.383
																														40.255	7.72
																														19.858	17.758
																														24.022	57.431
																														45.39	79.7
																														52.925	6.153
																														55.209	77.944
																														17.436	23.746
																														60.343	86.79
																														38.556	74.611
																														2.105	68.44
																														12.336	43.855
																														16.85	83.562
																														29.53	85.427
																														47.744	29.264
																														52.012	32.385
																														39.6	37.412
																														59.945	39.072
																														47.207	56.058
																														59.51	59.105
																														60.603	32.844
																														31.453	6.542
																														38.271	78.98
																														19.248	88.799
																														43.861	67.917
																														86.824	75.322
																														59.925	77.277
																														28.184	84.526
																														58.044	62.382
																														44.812	77.874
																														31.529	81.328
																														15.33	16.414
																														9.552	45.374
																														23.623	57.95
																														23.296	60.656
																														49.515	45.529
																														73.637	69.492
																														88.051	69.725
																														56.197	65.472
																														66.802	68.461
																														87.937	63.654
																														65.746	87.599
																														37.632	4.558
																														12.179	32.313
																														86.082	58.314
																														15.476	84.085
																														87.54	82.36
																														78.171	70.094
																														87.529	48.904
																														77.2	28.697
																														22.437	62.743
																														54.508	75.084
																														62.266	85.923
																														17.769	4.156
																														56.765	8.768
																														41.745	11.189
																														22.716	14.127
																														53.591	51.155
																														54.234	22.27
																														26.853	72.212
																														64.952	11.663
																														62.72	55.618
																														12.033	43.389
																														5.182	63.15
																														77.05	15.865
																														80.561	54.788
																														36.262	87.378
																														35.106	53.634
																														21.034	65.484
																														56.246	74.087
																														60.841	63.394
																														80.449	36.856
																														5.164	5.313
																														34.387	67.254
																														70	27.363
																														14.9	68.208
																														11.629	81.972
																														9.32	54.097
																														14.329	73.202
																														6.756	66.311
																														52.02	60.629
																														81.496	66.651
																														0.157	67.886
																														11.704	77.314
																														51.973	51.901
																														58.931	20.955
																														24.585	51.396
																														38.369	61.567
																														48.053	89.69
																														2.889	57.095
																														56.937	81.561
																														72.411	57.811
																														33.192	66.812
																														25.179	27.836
																														7.431	49.305
																														22.575	78.838
																														36.508	78.389
																														16.52	71.903
																														40.252	67.343
																														34.401	3.281
																														77.729	71.34
																														54.362	88.195
																														33.911	60.992
																														66.124	83.106
																														31.361	11.885
																														89.87	79.724
																														38.511	62.806
																														1.634	66.571
																														28.025	82.237
																														20.284	58.124
																														14.654	51.777
																														70.279	33.651
																														85.429	72.223
																														13.982	20.405
																														67.302	85.507
																														20.887	85.081
																														46.226	76.889
																														70.082	85.181
																														44.321	4.387
																														79.48	22.456
																														24.942	48.012
																														12.253	68.739
																														83.362	26.057
																														80.669	39.392
																														40.824	24.944
																														84.732	86.622
																														78.284	67.074
																														80.082	81.755
																														80.865	85.575
																														55.933	62.465
																														73.385	75.831
																														68.594	63.081
																														51.999	31.137
																														65.863	45.955
																														85.939	34.53
																														26.464	22.361
																														87.699	80.491
																														3.45	67.697
																														46.909	39.226
																														55.913	70.419
																														25.139	80.27
																														43.132	48.103
																														60.494	47.989
																														70.349	77.541
																														64.129	53.581
																														66.13	16.455
																														48.965	16.751
																														4.703	84.68
																														75.262	88.311
																														49.098	39.436
																														43.833	72.765
																														50.447	72.948
																														49.529	44.512
																														56.459	53.69
																														28.961	62.413
																														62.502	33.957
																														35.069	14.017
																														83.663	61.977
																														58.173	21.924
																														88.99	65.436
																														51.386	45.829
																														70.668	66.582
																														51.451	81.058
																														15.486	48.832
																														6.968	54.284
																														64.501	17.112
																														63.629	30.059
																														31.32	46.308
																														76.083	30.287
																														69.776	75.255
																														66.863	60.298
																														50.872	61.905
																														84.607	65.785
																														2.014	48.927
																														30.586	77.297
																														59.131	50.277
																														41.886	71.2
																														31.152	40.4
																														44.911	53.4
																														23.522	55.6
																														76.999	62.2
																														80.935	88.8
																														62.811	85.9
																														8.336	74.3
																														7.748	16.8
																														32.772	65.3
																														8.555	30.25
																														44.173	47.261
																														56.207	53.377
																														47.087	45.44
																														82.572	55.079
																														42.485	70.833
																														39.749	46.836
																														58.852	73.486
																														83.331	83.143
																														84.088	74.754
																														77.682	68.532
																														75.024	67.255
																														73.772	20.696
																														88.765	63.368
																														80.72	49.261
																														67.112	38.283
																														50.836	9.319
																														0.326	75.494
																														82.558	45.488
																														85.653	52.5
																														84.068	82.193
																														78.997	72.453
																														55.557	77.596
																														88.246	69.131
																														70.855	42.886
																														60.695	57.9
																														77.77	62.1
																														48.811	48.7
																														71.775	51.2
																														78.264	69.1
																														41.072	51.2
																														60.345	74.5
																														87.173	67.6
																														87.21	68.7
																														79.835	17
																														35.503	56.8
																														31.442	69.7
																														74.912	76.9
																														48.725	81.7
																														34.563	18.1
																														1.559	52
																														55.491	89.538
																														30.511	45.385
																														35.077	78.994
																														23.625	37.831
																														49.229	32.333
																														61.612	86.667
																														37.352	42.851
																														83.216	79.537
																														61.522	80.21
																														18.858	70.545
																														35.651	74.155
																														37.407	82.47
																														59.683	82.142
																														20.401	45.638
																														41.804	80.979
																														7.588	6.24
																														29.392	47.201
																														48.364	29.982
																														35.012	9.132
																														51.87	86.011
																														85.473	89.281
																														61.549	27.137
																														69.91	70.261
																														2.545	69.723
																														9.296	32.691
																														37.904	48.365
																														24.24	89.551
																														3.583	35.849
																														56.015	60.3
																														44.958	10.3
																														37.792	27.3
																														35.18	82.2
																														36.444	74.4
																														16.346	88.5
																														73.82	48.1
																														71.183	70.8
																														89.173	87.8
																														0.479	72.5
																														23.305	74.6
																														29.379	84.4
																														4.771	56.5
																														8.615	38.7
																														21.343	9.447
																														22.221	9.579
																														25.674	69.641
																														13.315	47.884
																														66.906	74.295
																														87.704	89.368
																														51.926	35.971
																														66.771	78.008
																														64.059	62.873
																														37.337	76.999
																														39.575	34.849
																														55.621	34.304
																														6.501	50.18
																														59.727	45.647
																														22.952	80.647
																														35.885	79.504
																														52.226	79.73
																														57.266	37.543
																														45.551	82.043
																														7.155	83.414
																														78.165	76.374
																														75.998	83.737
																														0.351	11.033
																														40.478	27.494
																														30.657	31.718
																														53.882	14.833
																														61.465	81.386
																														77.103	61.871
																														48.655	72.117
																														58.921	50.637
																														60.435	67
																														83.486	65.1
																														86.475	75.7
																														28.248	83
																														88.546	34.9
																														69.602	21.1
																														80.247	43.2
																														21.571	12.8
																														5.741	11.7
																														2.054	34.3
																														78.647	48.6
																														15.227	47.9
																														55.882	84.218
																														67.18	61.057
																														8.404	89.518
																														71.15	67.035
																														85.733	1.201
																														68.147	39.994
																														72.389	65.655
																														82.35	57.824
																														76.114	5.409
																														71.553	77.18
																														15.536	56.756
																														47.996	21.166
																														49.035	80.469
																														61.996	71.717
																														46.686	61.424
																														87.111	85.055
																														65.503	36.16
																														34.869	57.833
																														74.058	65
																														74.965	77.036
																														30.455	22.939
																														55.525	73.2
																														51.199	23.6
																														88.991	4.57
																														67.967	55.9
																														40.977	87
																														32.158	59.3
																														4.265	47.1
																														63.487	32.8
																														81.854	38.9
																														34.923	20.6
																														46.183	63.043
																														50.309	67.758
																														78.012	67.581
																														7.009	23.973
																														53.522	61.872
																														87.683	87.176
																														27.382	86.522
																														50.279	89.413
																														64.446	38.475
																														58.154	43.035
																														27.479	14.367
																														53.731	78.9
																														9.672	68.204
																														42.147	59.145
																														30.987	46.071
																														85.77	68.385
																														7.363	84.616
																														29.673	63.16
																														58.616	52.413
																														22.338	39.442
																														83.668	41.071
																														58.012	38.304
																														61.564	52.627
																														44.912	86.149
																														20.594	80.541
																														44.603	47.9
																														36.569	78.1
																														27.195	85.1
																														24.094	85.8
																														2.423	72.5
																														57.816	80.9
																														34.844	69.6
																														83.55	52.1
																														54.386	56.6
																														88.029	18.1
																														79.173	27.8
																														75.298	34.4
																														61.302	55
																														71.878	68.8
																														35.394	67.4
																														33.621	13.6
																														15.577	66.019
																														76.78	69.476
																														75.158	48.149
																														36.288	13.968
																														64.731	26.315
																														36.511	52.63
																														36.179	58.454
																														83.479	77.899
																														62.544	83.27
																														81.178	53.418
																														50.26	43.341
																														36.962	61.977
																														89.713	86.108
																														39.04	64.834
																														89.329	28.595
																														73.186	38.758
																														83.428	58.571
																														77.01	36.604
																														78.146	53.042
																														38.293	55.045
																														43.255	1.056
																														65.012	39.761
																														68.19	42.289
																														22.249	74.63
																														40.425	49.782
																														35.668	62.898
																														2.226	43.334
																														7.814	28.795
																														5.962	29.3
																														21.245	48.3
																														8.986	53.3
																														12.461	61.2
																														8.743	57.6
																														14.929	46.6
																														76.369	79.2
																														41.894	63
																														16.38	56.2
																														6.458	54.3
																														21.913	21.6
																														69.103	64.3
																														6.557	84
																														41.724	58.9
																														66.351	66.073
																														21.535	88.682
																														19.782	43.142
																														50.998	69.686
																														38.63	59.153
																														22.695	40.489
																														83.845	36.4
																														1.337	13.911
																														68.13	6.135
																														73.13	31.982
																														28.766	79.714
																														82.099	53.524
																														52.832	38.299
																														37.2	35.499
																														31.56	43.283
																														86.851	44.5
																														73.916	57.1
																														67.033	83.9
																														0.911	82.3
																														32.157	39.2
																														55.126	75.4
																														83.641	77.8
																														59.557	62.7
																														42.366	25.6
																														21.077	51.8
																														23.799	46.3
																														11.695	83.1
																														27.598	76.447
																														86.656	73.699
																														52.787	61.156
																														54.529	62.442
																														84.432	86.004
																														79.23	83.433
																														0.236	84.491
																														33.85	42.416
																														13.45	26.03
																														44.985	32.54
																														84.044	85.557
																														71.129	13.97
																														57.294	4.85
																														42.859	88.9
																														7.615	83.6
																														44.061	84.785
																														8.044	86.892
																														16.03	80.72
																														82.795	6.45
																														63.66	3.698
																														58.61	35.552
																														13.925	41.93
																														66.479	12.1
																														75.899	3.24
																														76.55	88.6
																														79.391	43.9
																														87.103	86.1
																														78.115	13.9
																														89.727	52.5
																														2.226	43.6
																														9.43	66.9
																														29.661	87.7
																														26.47	1.16
																														45.683	70.7
																														77.523	61.7
																														48.675	87.6
																														43.138	89.2
																														30.196	34.5
																														71.799	82.5
																														1.02	66.5
																														79.16	68.8
																														47.467	55.361
																														88.239	84.962
																														49.862	70.725
																														79.873	77.909
																														85.556	46.06
																														74.017	26.133
																														85.296	70.214
																														55.851	79.677
																														83.393	88.038
																														66.915	82.211
																														88.637	56.566
																														68.825	85.613
																														11.465	80.914
																														60.061	77.264
																														15.252	82
																														25.083	51
																														41.22	15.7
																														56.167	58.098
																														77.48	67.434
																														81.693	88.11
																														49.909	78.3
																														81.341	55
																														48.323	1.75
																														21.318	84.7
																														53.127	73.4
																														72.981	84.2
																														69.19	68.9
																														85.33	11.7
																														52.275	83.3
																														38.418	80.7
																														56.81	81.3
																														40.806	49
																														75.22	79.8
																														81.8	25.9
																														32.897	62.4
																														29.452	47.3
																														82.028	45.4
																														86.45	67.1
																														30.616	45.6
																														25.69	66.3
																														62.851	77.1
																														80.081	58.2
																														45.767	46.827
																														34.965	48.621
																														57.328	86.756
																														69.327	65.096
																														61.557	53.544
																														9.939	66.085
																														14.405	55.057
																														31.735	26.7
																														6.206	21.183
																														6.384	31.711
																														33.629	13.99
																														39.495	36.466
																														28.556	7.823
																														57.875	58.836
																														88.914	78.5
																														81.252	89.3
																														68.127	71
																														21.196	58.8
																														34.813	58.2
																														45.831	20.026
																														80.381	46.134
																														48.748	27.3
																														21.816	49.9
																														36.401	27.677
																														70.288	24.296
																														39.223	52.156
																														4.367	60.7
																														76.375	73.7
																														7.917	59
																														28.5	19.7
																														70.832	8.18
																														55.225	41.7
																														76.935	27.4
																														44.225	3.83
																														5.899	19.9
																														80.226	40.7
																														80.559	43.3
																														75.714	53.2
																														7.952	52.3
																														43.145	25.2
																														73.074	80.9
																														23.277	35.1
																														86.835	4.002
																														21.105	4.883
																														30.768	16.585
																														5.079	47.893
																														68.274	72.4
																														45.554	62.056
																														29.472	44.413
																														82.978	34.647
																														24.351	33
																														1.469	53
																														53.932	36.107
																														89.401	0.917
																														69.819	89.803
																														15.417	66.2
																														56.69	21.8
																														22.214	2.37
																														56.057	26.3
																														10.271	69.1
																														40.291	49.2
																														15.148	45.7
																														29.987	49.017
																														55.472	49.567
																														87.68	41.666
																														43.765	48.7
																														13.623	50.2
																														59.395	35.923
																														53.773	55.318
																														48.531	70.851
																														31.384	35.853
																														19.242	19.549
																														14.133	62.377
																														36.894	58.252
																														22.319	60.24
																														36.062	65.828
																														67.562	55.627
																														18.001	37.38
																														35.488	84.078
																														66.932	35.172
																														13.524	89.919
																														2.58	46.305
																														32.967	68.073
																														27.951	81.074
																														66.682	68.378
																														2.873	67.31
																														48.548	51.53
																														42.054	52.747
																														47.7	56.11
																														42.416	74.472
																														62.304	75.288
																														86.07	67.111
																														76.577	81.371
																														81.247	29.405
																														79.208	77.742
																														85.476	61.89
																														23.72	57.072
																														42.779	56.612
																														75.285	84.551
																														20.852	78.435
																														4.558	69.782
																														13.367	82.338
																														11.577	88.847
																														41.592	81.586
																														69.048	87.495
																														69.074	77.099
																														39.434	59.819
																														64.15	68.741
																														67.858	85.036
																														65.058	79.207
																														46.912	81.617
																														40.029	63.993
																														61.116	73.868
																														28.005	83.498
																														25.915	84.999
																														1.847	85.758
																														38.155	67.24
																														76.742	62.611
																														86.021	74.184
																														42.704	65.478
																														17.574	52.717
																														46.154	41.611
																														65.454	84.301
																														75.195	83.775
																														61.298	27.27
																														64.531	70.405
																														89.723	48.112
																														41.238	84.578
																														59.968	25.856
																														70.494	4.868
																														42.755	17.644
																														69.878	82.159
																														89.816	88.881
																														31.74	40.465
																														89.186	51.54
																														38.193	46.955
																														87.567	89.276
																														69.411	36.679
																														79.974	12.108
																														71.183	53.047
																														84.303	71.075
																														75.824	79.029
																														77.059	34.756
																														2.365	33.727
																														41.15	43.695
																														8.517	63.393
																														13.703	36.4
																														89.349	36.828
																														13.664	54.239
																														16.926	59.831
																														23.223	49.983
																														86.251	45.722
																														11.419	21.707
																														15.322	18.052
																														44.137	11.008
																														79.792	33.592
																														55.476	48.369
																														36.238	47.035
																														14.559	42.235
																														37.984	2.202
																														54.266	87.802
																														42.988	22.025
																														79.474	55.271
																														61.159	45.022
																														48.163	44.687
																														60.106	37.646
																														60.029	73.568
																														13.125	0.685
																														71.436	24.31
																														88.492	47.532
																														89.538	82.171
																														58.088	52.896
																														42.435	33.258
																														56.965	80.744
																														43.66	72.415
																														15.881	78.571
																														29.582	42.608
																														43.815	11.557
																														37.455	17.607
																														31.731	14.968
																														63.824	10.082
																														82.587	51.49
																														61.959	45.796
																														49.438	32.294
																														83.185	28.945
																														78.889	28.175
																														58.475	4.157
																														53.611	46.722
																														65.549	34.933
																														27.933	26.475
																														71.251	33.728
																														67.597	8.828
																														57.169	1.89
																														68.289	23.457
																														60.516	25.018
																														83.56	10.363
																														66.524	88.378
																														69.492	71.543
																														69.861	13.719
																														73.317	53.319
																														72.814	2.415
																														85.469	11.828
																														17.117	63.102
																														52.737	49.991
																														0.736	51.4
																														1.015	77.794
																														24.924	75.437
																														49.05	75.93
																														71.787	86.69
																														25.528	85.831
																														17.622	44.011
																														18.424	48.127
																														22.92	73.272
																														37.308	86.586
																														58.037	13.617
																														0.566	54.325
																														50.175	73.615
																														56.334	74.215
																														30.394	89.377
																														48.577	88.991
																														30.211	83.155
																														10.515	67.866
																														53.79	9.017
																														5.899	65.622
																														16.937	89.483
																														28.551	88.065
																														7.659	68.859
																														0.184	44.813
																														12.417	76.79
																														7.562	55.316
																														58.665	88.285
																														80.131	40.445
																														68.627	82.084
																														75.215	85.24
																														59.63	86.893
																														11.588	74.448
																														72.896	88.988
																														70.618	89.345
																														58.107	74.692
																														76.447	40.868
																														17.584	66.923
																														61.141	86.547
																														32	55.811
																														10.003	69.034
																														77.671	73.142
																														47.759	89.748
																														82.828	70.896
																														76.312	66.474
																														80.062	61.219
																														86.751	38.114
																														79.077	77.426
																														76.452	34.57
																														68.355	1.52
																														58.416	21.985
																														83.553	37.728
																														87.598	79.872
																														61.934	71.374
																														6.446	81.466
																														55.715	47.149
																														36.672	81.216
																														35.269	54.712
																														24.308	37.546
																														44.027	55.49
																														50.151	10.485
																														88.146	56.786
																														75.125	80.626
																														64.785	74.978
																														67.007	84.915
																														73.508	74.493
																														52.037	85.376
																														14.54	61.263
																														69.953	14.621
																														14.719	22.745
																														44.001	42.561
																														51.482	88.122
																														86.519	39.75
																														54.298	30.355
																														1.318	61.428
																														66.048	56.466
																														30.323	57.496
																														5.323	75.992
																														24.724	79.33
																														11.798	43.379
																														48.245	87.472
																														38.72	79.179
																														28.737	52.02
																														43.781	25.653
																														14.615	66.976
																														13.242	76.244
																														9.119	69.177
																														11.294	63.713
																														7.884	54.473
																														35.529	63.429
																														53.208	81.468
																														68.773	52.261
																														67.041	24.759
																														7.057	85.276
																														74.286	30.514
																														84.374	9.69
																														20.17	29.965
																														89.392	37.887
																														36.9	76.588
																														75.243	56.492
																														79.836	76.054
																														79.561	81.275
																														7.506	85.809
																														21.667	87.427
																														61.393	59.809
																														43.64	80.346
																														73.568	41.375
																														26.624	1.462
																														49.544	35.78
																														67.656	49.228
																														19.488	86.125
																														43.247	87.067
																														11.37	81.012
																														47.597	34.361
																														13.046	62.716
																														38.465	59.093
																														35.83	43.669
																														80.103	40.429
																														15.173	7.373
																														52.895	48.224
																														61.705	1.987
																														77.593	21.036
																														75.805	88.379
																														13.555	58.817
																														49.384	69.82
																														71.323	49.636
																														63.306	57.406
																														43.539	83.222
																														87.79	51.063
																														7.087	39.664
																														46.27	69.896
																														51.372	28.338
																														13.127	31.743
																														84.17	64.726
																														86.15	60.243
																														89.865	79.999
																														1.451	71.029
																														63.316	54.919
																														66.278	51.735
																														32.772	19.805
																														57.284	41.469
																														77.042	43.504
																														74.847	15.627
																														48.876	41.625
																														69.44	35.741
																														59.415	41.166
																														57.239	20.475
																														0.547	42.303
																														72.101	58.448
																														65.059	54.011
																														69.989	71.072
																														14.416	66.954
																														74.263	37.249
																														86.226	39.174
																														16.777	60.621
																														56.142	67.047
																														54.883	80.006
																														8.548	82.177
																														39.167	62.341
																														18.466	24.782
																														73.209	59.929
																														6.286	38.144
																														49.85	33.637
																														21.677	71.069
																														46.581	73.358
																														88.482	85.61
																														36.573	48.918
																														67.755	1.478
																														55.592	52.577
																														82.105	68.203
																														87.64	35.736
																														47.155	51.681
																														82.99	68.704
																														81.181	75.823
																														35.902	85.207
																														32.968	68.23
																														3.493	74.854
																														63.14	75.292
																														36.428	49.183
																														21.244	29.045
																														65.191	82.538
																														24.752	71.179
																														52.494	63.078
																														89.221	69.539
																														50.236	59.563
																														53.457	73.555
																														13.338	69.076
																														52.024	87.08
																														66.951	67.269
																														53.889	79.763
																														13.443	52.364
																														6.779	63.653
																														50.063	45.514
																														5.123	85.516
																														20.833	86.459
																														59.754	74.351
																														66.813	64.836
																														87.859	55.657
																														77.585	78.239
																														59.95	59.188
																														59.62	43.893
																														46.8	76.632
																														57.654	68.512
																														20.586	2.207
																														50.063	75.261
																														4.373	88.83
																														82.254	77.959
																														70.675	80.519
																														67.337	49.414
																														48.489	60.511
																														79.377	89.675
																														75.388	7.317
																														6.314	12.171
																														51.604	69.599
																														64.081	17.632
																														41.066	81.406
																														19.858	87.006
																														42.746	63.226
																														35.181	78.778
																														43.281	70.497
																														21.624	37.514
																														39.327	55.773
																														52.318	84.281
																														62.335	49.437
																														72.873	37.077
																														37.738	12.406
																														33.397	82.689
																														39.812	87.008
																														39.673	72.274
																														53.139	86.604
																														47.227	51.465
																														29.69	51.16
																														27.736	25.362
																														6.355	59.528
																														9.094	83.647
																														33.58	64.986
																														70.526	43.821
																														29.953	18.447
																														25.467	66.465
																														64.182	74.096
																														34.981	75.643
																														26.918	72.279
																														32.925	79.229
																														13.695	15.216
																														63.278	80.346
																														57.718	82.144
																														61.291	62.68
																														67.916	55.291
																														35.494	12.578
																														39.919	66.628
																														21.782	65.155
																														61.566	54.825
																														49.251	81.754
																														8.424	79.699
																														38.082	85.189
																														88.733	55.718
																														49.923	56.118
																														58.025	88.658
																														75.822	88.143
																														17.614	58.525
																														79.679	51.089
																														7.642	52.98
																														64.347	88.902
																														69.472	32.062
																														39.486	84.841
																														43.776	81.622
																														30.19	52.047
																														59.385	72.933
																														0.372	89.779
																														1.345	87.845
																														15.671	56.087
																														38.131	67.7
																														56.948	57.006
																														38.076	87.133
																														64.832	67.49
																														68.981	55.793
																														38.907	17.55
																														17.303	79.41
																														31.129	32.905
																														34.97	7.56
																														18.68	28.351
																														38.265	24.893
																														44.83	42.624
																														39.147	32.91
																														51.636	88.923
																														41.293	51.37
																														41.64	55.74
																														6.756	67.203
																														36.822	80.219
																														9.54	84.625
																														25.675	56.373
																														36.335	66.312
																														54.731	13.438
																														63.516	62.916
																														12.842	17.646
																														42.774	29.696
																														69.104	50.376
																														61.22	46.372
																														48.847	88.82
																														17.428	79.036
																														4.227	68.432
																														27.406	72.648
																														53.448	84.85
																														42.297	64.986
																														23.335	84.426
																														28.524	69.686
																														50.13	63.763
																														86.663	45.43
																														83.826	2.897
																														5.594	76.728
																														31.111	83.456
																														35.496	88.042
																														42.139	79.959
																														60.943	53.301
																														6.207	67.655
																														64.521	80.08
																														19.889	85.643
																														24.835	81.492
																														9.285	56.3
																														20.198	78.028
																														87.21	89.88
																														31.071	35.109
																														55.841	84.734
																														14.295	75.526
																														25.032	75.541
																														62.632	58.394
																														27.223	78.722
																														39.017	89.632
																														32.07	80.52
																														45.401	54.958
																														17.932	70.29
																														69.939	68.638
																														28.811	37.621
																														51.938	69.829
																														86.744	4.7
																														56.276	12.309
																														47.523	50.919
																														9.146	31.616
																														75.761	59.069
																														81.914	24.405
																														42.131	87.327
																														45.074	69.095
																														83.896	69.137
																														88.587	82.073
																														73.674	74.69
																														41.313	29.802
																														41.305	88.624
																														23.374	46.45
																														32.07	64.233
																														4.491	52.695
																														10.795	85.256
																														50.732	62.693
																														25.053	70.84
																														59.444	87.519
																														39.774	56.578
																														25.799	87.918
																														12.436	37.451
																														23.134	37.398
																														82.025	59.561
																														43.558	68.633
																														76.005	70.555
																														73.614	14.921
																														65.802	55.061
																														60.786	21.385
																														23.902	13.965
																														32.743	58.224
																														15.484	77.231
																														23.877	72.497
																														38.083	58.146
																														29.299	87.095
																														12.281	82.767
																														32.297	71.199
																														33.177	31.587
																														6.225	40.019
																														82.729	79.686
																														53.663	80.828
																														43.002	39.571
																														40.507	26.197
																														65.774	81.341
																														72.816	64.093
																														69.177	57.79
																														78.667	43.081
																														50.867	65.447
																														40.63	88.369
																														2.335	73.84
																														32.166	88.877
																														42.284	58.913
																														67.709	68.563
																														83.977	74.597
																														37.043	65.39
																														88.709	29.965
																														21.452	77.549
																														43.603	61.217
																														27.245	53.424
																														10.399	71.41
																														10.803	40.778
																														55.02	73.37
																														54.462	76.183
																														52.011	87.333
																														51.458	34.149
																														72.624	59.329
																														51.604	21.669
																														50.088	84.523
																														70.339	48.223
																														15.194	41.52
																														14.177	37.242
																														55.132	40.728
																														36.239	56.221
																														27.925	59.138
																														74.357	71.56
																														26.229	52.585
																														24.529	83.532
																														45.796	31.493
																														52.834	70.596
																															83.924
																															49.544
																															30.016
																															43.984
																															17.722
																															65.594
																															0.094
																															24.698
																															33.709
																															44.042
																															66.48
																															50.348
																															40.789
																															77.098
																															33.781
																															32.109
																															54.534
																															12.575
																															76.309
																															24.983
																															30.837
																															22.208
																															50.965
																															55.535
																															48.734
																															58.751
																															52.842
																															48.01
																															58.138
																															69.933
																															85.177
																															88.013
																															58.701
																															58.463
																															25.859
																															61.74
																															82.871
																															76.028
																															43.836
																															63.359
																															49.745
																															48.987
																															63.939
																															73.784
																															34.226
																															60.012
																															37.404
																															84.311
																															72.254
																															42.075
																															22.186
																															76.725
																															69.372
																															66.653
																															67.947
																															49.98
																															87.243
																															75.922
																															50.319
																															67.279
																															42.755
																															75.576
																															72.01
																															55.454
																															50.418
																															88.231
																															48.522
																															71.544
																															61.406
																															66.9
																															57.182
																															79.322
																															80.261
																															26.515
																															29.771
																															35.426
																															61.67
																															18.943
																															75.816
																															52.627
																															34.787
																															89.774
																															88.738
																															65.034
																															76.093
																															84.85
																															63.05
																															31.139
																															59.198
																															69.614
																															56.593
																															4.773
																															61.431
																															54.479
																															59.483
																															73.759
																															72.118
																															85.696
																															81.909
																															57.697
																															71.413
																															31.021
																															65.849
																															88.294
																															80.953
																															44.118
																															72.827
																															78.402
																															81.311
																															55.746
																															74.651
																															74.178
																															1.905
																															67.66
																															85.907
																															88.898
																															71.728
																															56.017
																															16.028
																															40.719
																															68.766
																															49.002
																															88.122
																															88.986
																															85.994
																															77.221
																															70.945
																															59.382
																															71.986
																															63.882
																															69.539
																															73.696
																															52.244
																															47.65
																															40.361
																															89.883
																															88.738
																															73.577
																															86.075
																															75.205
																															57.167
																															37.055
																															68.699
																															52
																															3.647
																															47.353
																															10.635
																															19.896
																															2.258
																															72.002
																															35.178
																															50.576
																															72.014
																															55.122
																															46.522
																															38.401
																															43.76
																															21.052
																															75.251
																															23.851
																															66.423
																															58.706
																															46.433
																															54.307
																															82.168
																															66.802
																															44.609
																															35.213
																															62.02
																															24.707
																															47.556
																															41.082
																															78.824
																															85.673
																															72.055
																															25.781
																															43.623
																															31.585
																															57.709
																															59.996
																															32.376
																															74.649
																															77.179
																															20.608
																															48.16
																															56.139
																															88.329
																															46.819
																															66.763
																															52.344
																															32.22
																															32.134
																															46.052
